# Supplementary material
Source: publisher site journal article supplement (https://www.dovepress.com/article/294867)

**Table S1 Sensitivity and PPV of the three ML algorithms tested on undersampled (equal) and not undersampled (real) data, without features based on predictions**

|  | min  (equal/**real**) | max (equal/**real**) | mean (equal/**real**) | median (equal/**real**) | standard deviation (equal/**real**) |
| --- | --- | --- | --- | --- | --- |
| **RF**  (Sensitivity) | 96.97 **96.97** | 100 **100** | 99.70 **99.70** | 100 **100** | 0.96 **0.96** |
| **RF**  (PPV) | 47.96 **1.22** | 54.71 **1.37** | 50.96 **1.29** | 50.80 **1.30** | 2.08 **0.04** |
| **GBT** (Sensitivity) | 13.13 **26.60** | 21.51 **39.39** | 17.49 **32.14** | 17.92 **31.20** | 2.94 **3.86** |
| **GBT**  (PPV) | 14.12 **1.83** | 37.74 **2.61** | 27.23 **2.23** | 27.54 **2.20** | 7.25 **0.24** |
| **SVM Linear** (Sensitivity) | 29.90 **32.74** | 50.51 **47.79** | 39.30 **39.73** | 38.84 **38.94** | 7 **5.54** |
| **SVM Linear** (PPV) | 33.33 **0.63** | 47 **1.10** | 39.78 **0.82** | 39.15 **0.81** | 4.25 **0.15** |
| **SVM Polynomial** (Sensitivity) | 0 **0.89** | 100 **98.23** | 50 **49.38** | 50 **50** | 52.71 **41.51** |
| **SVM Polynomial** (PPV) | 0 **0** | 54.71 **1.33** | 25.71 **0.80** | 24.74 **1.23** | 27.15 **0.68** |
| **SVM Radial basis** (Sensitivity) | 42.27 **34.51** | 58.76 **50.44** | 48.73 **40.97** | 47.15 **39.38** | 5.56 **5.47** |
| **SVM Radial basis** (PPV) | 37.39 **0.81** | 50.89 **1.14** | 42.64 **0.93** | 41.83 **0.91** | 4.31 **0.11** |
| **SVM Sigmoid** (Sensitivity) | 35.05 **33.63** | 50.51 **49.56** | 40.01 **39.65** | 36.36 **38.94** | 6.23 **6.14** |
| **SVM Sigmoid** (PPV) | 34 **0.71** | 45.19 **1.10** | 39.34 **0.83** | 39.05 **0.77** | 3.97 **0.13** |
| **SVM Sigmoid Tuned** (Sensitivity) | 34.31 **34.31** | 51.65 **51.65** | 43.95 **43.95** | 43.20 **43.20** | 5.81 **5.81** |
| **SVM Sigmoid Tuned** (PPV) | 44.30 **1.13** | 60.87 **1.45** | 51.32 **1.29** | 50.81 **1.30** | 5.66 **0.13** |

Undersampled testing data contains the same number of positive vs negative data (50% / 50%) whereas not undersampled data contains real proportions (1.4% / 98.6%). Statistics that correspond to real data are set in bold. Blue background contains results for sensitivity, white background for PPV. The flexibility, secondary structure and φ/ψ angles features were not used in the ML. Values are indicated in %.

**Abbreviations:** PPV, Positive Predictive Value; ML, Machine Learning; RF, Random Forest; GBT, Gradient Boosting Tree; SVM, Support Vector Machine.

**Figure S1: Accessibility of *O*-GlcNAcylated sites**

*The accessibility was computed with NAccess on structures modeled with I-TASSER.*


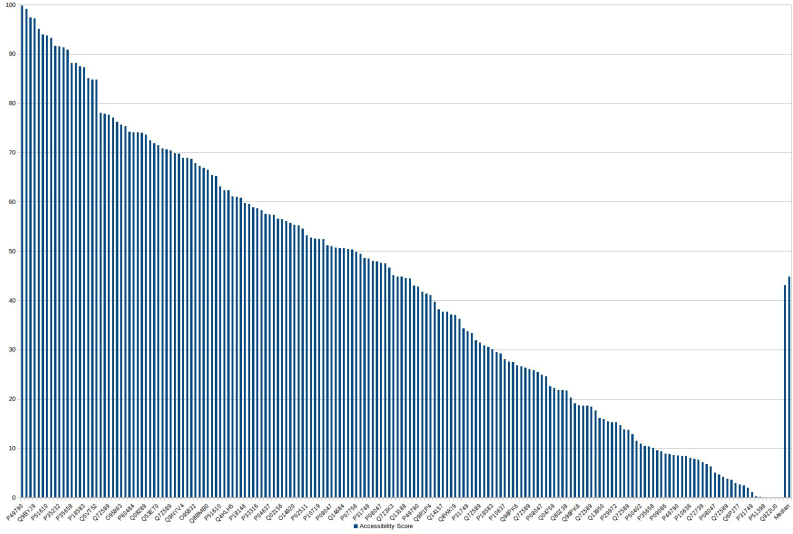

Supplement: Supplementary file 1 [file get_supplementary_file.php]
